# Supplementary material
Source: HighWire-hosted journal article supplement (https://bmjopen.bmj.com/content/9/7/e025564)
Supplement: inline-supplementary-material-2 [file inline-supplementary-material-2.pdf]

Name of participant: \_\_\_\_\_

Participant ID: \_\_\_\_\_

Acupuncture for cancer pain: a pilot pragmatic randomized  
controlled trial

# Case Report Form

(Translated from Chinese)

Participant ID: \_\_\_\_\_

Name of Participant: \_\_\_\_\_

Name of investigator: \_\_\_\_\_

Date of recruitment: \_\_\_ \_\_\_ (Day) \_\_\_ \_\_\_ (Month) \_\_\_ \_\_\_ \_\_\_ \_\_\_ (Year)

Date of trial completion: \_\_\_ \_\_\_ (Day) \_\_\_ \_\_\_ (Month) \_\_\_ \_\_\_ \_\_\_ \_\_\_ (Year)

Name of participant: \_\_\_\_\_

Participant ID: \_\_\_\_\_

**Research Stages: Assessment Table**

| Day \ Assessment Items | 0                        | 1                        | 2                        | 3                        | 4                        | 5                        | 6                        | 7                        | 14                       | 21                       |
|------------------------|--------------------------|--------------------------|--------------------------|--------------------------|--------------------------|--------------------------|--------------------------|--------------------------|--------------------------|--------------------------|
| General information*   | <input type="checkbox"/> |                          |                          |                          |                          |                          |                          |                          |                          |                          |
| Analgesic consumption  | <input type="checkbox"/> |
| NRS                    | <input type="checkbox"/> |
| FBP                    | <input type="checkbox"/> |
| AEs                    | <input type="checkbox"/> |
| Acupuncture therapy    |                          | <input type="checkbox"/> | <input type="checkbox"/> |                          | <input type="checkbox"/> |                          | <input type="checkbox"/> |                          |                          |                          |
| Drop-outs with reasons |                          | <input type="checkbox"/> |
| Other medications used |                          | <input type="checkbox"/> |

Notes: Items with “” are required to be checked. Please tick the correspondent boxes (“”) once assessment is completed. \*General information includes basic characteristics of patients, vital signs, history of allergy and any other conditions, clinical and pathological diagnosis of cancer; treatment received for cancer and other complications or side effects; NRS: Numerical rating scale; FBP: Frequency of breakthrough pain and rescue medication; AEs: adverse events.

Name of participant: \_\_\_\_\_

Participant ID: \_\_\_\_\_

### Selection criteria

| Inclusion criteria                                             | Yes                      | No                       |
|----------------------------------------------------------------|--------------------------|--------------------------|
| 1. Cancer confirmed by histological or cytological examination | <input type="checkbox"/> | <input type="checkbox"/> |
| 2. NRS $\geq 4$ for the past 24 hours                          | <input type="checkbox"/> | <input type="checkbox"/> |
| 3. Age $\geq 18$                                               | <input type="checkbox"/> | <input type="checkbox"/> |
| 4. Signed informed consent                                     | <input type="checkbox"/> | <input type="checkbox"/> |

If any of the above items is answered with “No”, the patient can not be recruited into the trial.

| Exclusion criteria                                                                                                                                                                                                                                          | Yes                      | No                       |
|-------------------------------------------------------------------------------------------------------------------------------------------------------------------------------------------------------------------------------------------------------------|--------------------------|--------------------------|
| 1. Severe and unstable physical illnesses, such as disorders of consciousness, dyspnoea, acute myocardial infarction, acute heart failure, acute renal failure, diabetic ketoacidosis, as well as any other critical conditions or acute stage of disorders | <input type="checkbox"/> | <input type="checkbox"/> |
| 2. Lactation, pregnancy or intend to be pregnant within 6 months                                                                                                                                                                                            | <input type="checkbox"/> | <input type="checkbox"/> |
| 3. Abnormal result on coagulation test, or platelet count $\leq 50000$ / L, or with any complications of hemorrhagic disease                                                                                                                                | <input type="checkbox"/> | <input type="checkbox"/> |
| 4. Local skin lesions such as burns, eczema, ulcers, frostbite ulceration and other contraindications for acupuncture treatment                                                                                                                             | <input type="checkbox"/> | <input type="checkbox"/> |
| 5. Patients with needle phobia                                                                                                                                                                                                                              | <input type="checkbox"/> | <input type="checkbox"/> |
| 6. Could not follow or response to treatment instructions                                                                                                                                                                                                   | <input type="checkbox"/> | <input type="checkbox"/> |

If any of the above items is answered with “Yes”, the patient could not be recruited in the trial.

### Informed consent

Date of signing informed consent: \_\_\_ \_\_\_ (Day) \_\_\_ \_\_\_ (Month) \_\_\_ \_\_\_ \_\_\_ \_\_\_ (Year)

Name of participant: \_\_\_\_\_

Participant ID: \_\_\_\_\_

(Attach Allocation Card Here)

Name of participant: \_\_\_\_\_

Participant ID: \_\_\_\_\_

## Baseline assessment

Day 0 (Baseline)

### 1. General information

- 1.1. Date of Birth:  (Day)  (Month)  (Year) Age:
- 1.2. Gender:  Male  Female
- 1.3. Marital status:  Married  Single  Divorced  Widowed
- 1.4. Nationality:  Han  Other: \_\_\_\_\_
- 1.5. Height:  cm Weight:  kg
- 1.6. Degree of education:  no formal education  Primary school  Junior high school  Senior high school or technical secondary school  Junior college or bachelor degree  Master degree or above
- 1.7. Occupation:  Worker  Farmer  Student  Politician  Professional  Retired  Freelancer  Other: \_\_\_\_\_
- 1.8. Settlement:  Guangdong, China  Other: \_\_\_\_\_

### 2. Vital Signs

- 2.1. Body temperature .°C
- 2.2. Respiratory rate  times/minute
- 2.3. Heart rate  Beats/ minutes
- 2.4. Blood Pressure  mmHg/  mmHg

### 3. History of allergy

No  Yes (If yes, please record the following details)

- 3.1. Allergic to medication \_\_\_\_\_
- 3.2. Allergic to food \_\_\_\_\_
- 3.3. Contact allergy \_\_\_\_\_

Name of participant: \_\_\_\_\_

Participant ID: \_\_\_\_\_

4. History of cancer

- 4.1. Tumor types:  (1. Lung cancer 2. Liver cancer 3. Gastric cancer 4. Intestinal/colorectal cancer 5. Ovarian cancer  
6. Breast cancer 7. Nasopharyngeal carcinoma 8. Other \_\_\_\_\_)

Date of initial diagnosis of tumor:  (Day)  (Month)  (Year)

Primary site: \_\_\_\_\_

- 4.2. The current TNM staging: T N M

Clinical classification : 0.0 Stage 1. Hidden Stage 2.Ia Stage 3.Ib Stage 4.IIa Stage 5.IIb Stage 6.IIIa  
Stage 7.IIIb Stage 8.IV Stage

Date of diagnosis:  (Day)  (Month)  (Year)

- 4.3. The current anti-cancer treatment: 1. First-line program 2. Second-line program 3. Third-line and above programs

Evaluation of the effect of cancer treatment: 1. CR, complete response 2. PR, partial response 3. SD, stable disease  
4. PD, progressive disease

5. Treatments for cancer

- 5.1. Surgery No Yes (If Yes, please provide details of treatment)

| Name of surgery | Date of surgery                                                                                                                                                                                     | Purpose of surgery                                                    |
|-----------------|-----------------------------------------------------------------------------------------------------------------------------------------------------------------------------------------------------|-----------------------------------------------------------------------|
|                 | <input type="checkbox"/> <input type="checkbox"/> (Day) <input type="checkbox"/> <input type="checkbox"/> (Month) <input type="checkbox"/> <input type="checkbox"/> <input type="checkbox"/> (Year) | <input type="checkbox"/> Palliative <input type="checkbox"/> Curative |
|                 | <input type="checkbox"/> <input type="checkbox"/> (Day) <input type="checkbox"/> <input type="checkbox"/> (Month) <input type="checkbox"/> <input type="checkbox"/> <input type="checkbox"/> (Year) | <input type="checkbox"/> Palliative <input type="checkbox"/> Curative |
|                 | <input type="checkbox"/> <input type="checkbox"/> (Day) <input type="checkbox"/> <input type="checkbox"/> (Month) <input type="checkbox"/> <input type="checkbox"/> <input type="checkbox"/> (Year) | <input type="checkbox"/> Palliative <input type="checkbox"/> Curative |

- 5.2. Radiotherapy No Yes (If yes, please provide details)

| Location of radiotherapy | Date of radiotherapy                                                                                                                                                                                | Purpose of radiotherapy                                                                                  |
|--------------------------|-----------------------------------------------------------------------------------------------------------------------------------------------------------------------------------------------------|----------------------------------------------------------------------------------------------------------|
|                          | <input type="checkbox"/> <input type="checkbox"/> (Day) <input type="checkbox"/> <input type="checkbox"/> (Month) <input type="checkbox"/> <input type="checkbox"/> <input type="checkbox"/> (Year) | <input type="checkbox"/> Assistive <input type="checkbox"/> Palliative <input type="checkbox"/> Curative |
|                          | <input type="checkbox"/> <input type="checkbox"/> (Day) <input type="checkbox"/> <input type="checkbox"/> (Month) <input type="checkbox"/> <input type="checkbox"/> <input type="checkbox"/> (Year) | <input type="checkbox"/> Assistive <input type="checkbox"/> Palliative <input type="checkbox"/> Curative |
|                          | <input type="checkbox"/> <input type="checkbox"/> (Day) <input type="checkbox"/> <input type="checkbox"/> (Month) <input type="checkbox"/> <input type="checkbox"/> <input type="checkbox"/> (Year) | <input type="checkbox"/> Assistive <input type="checkbox"/> Palliative <input type="checkbox"/> Curative |

Name of participant: \_\_\_\_\_

Participant ID: \_\_\_\_\_

5.3. Chemotherapy No Yes (If yes, please provide details)

| Starting date                                                                                                                                                                                                                | End date                                                                                                                                                                                                                     | Treatment type: 1 adjuvant therapy 2 neoadjuvant therapy 3 advanced or diffuse lesions |
|------------------------------------------------------------------------------------------------------------------------------------------------------------------------------------------------------------------------------|------------------------------------------------------------------------------------------------------------------------------------------------------------------------------------------------------------------------------|----------------------------------------------------------------------------------------|
| <input type="checkbox"/> <input type="checkbox"/> (Day) <input type="checkbox"/> <input type="checkbox"/> (Month) <input type="checkbox"/> <input type="checkbox"/> <input type="checkbox"/> <input type="checkbox"/> (Year) | <input type="checkbox"/> <input type="checkbox"/> (Day) <input type="checkbox"/> <input type="checkbox"/> (Month) <input type="checkbox"/> <input type="checkbox"/> <input type="checkbox"/> <input type="checkbox"/> (Year) | <input type="checkbox"/> 1 <input type="checkbox"/> 2 <input type="checkbox"/> 3       |
| <input type="checkbox"/> <input type="checkbox"/> (Day) <input type="checkbox"/> <input type="checkbox"/> (Month) <input type="checkbox"/> <input type="checkbox"/> <input type="checkbox"/> <input type="checkbox"/> (Year) | <input type="checkbox"/> <input type="checkbox"/> (Day) <input type="checkbox"/> <input type="checkbox"/> (Month) <input type="checkbox"/> <input type="checkbox"/> <input type="checkbox"/> <input type="checkbox"/> (Year) | <input type="checkbox"/> 1 <input type="checkbox"/> 2 <input type="checkbox"/> 3       |
| <input type="checkbox"/> <input type="checkbox"/> (Day) <input type="checkbox"/> <input type="checkbox"/> (Month) <input type="checkbox"/> <input type="checkbox"/> <input type="checkbox"/> <input type="checkbox"/> (Year) | <input type="checkbox"/> <input type="checkbox"/> (Day) <input type="checkbox"/> <input type="checkbox"/> (Month) <input type="checkbox"/> <input type="checkbox"/> <input type="checkbox"/> <input type="checkbox"/> (Year) | <input type="checkbox"/> 1 <input type="checkbox"/> 2 <input type="checkbox"/> 3       |

6. Pain assessments

6.1. Score on Numerical rating scale

- Verbal: “What number describes your pain from 0 (no pain) to 10 (worst pain you can imagine)?”
- Written: “Circle the number that describes your pain.”

0      1      2      3      4      5      6      7      8      9      10  
 No pain Worst pain you can imagine

Categorical scale:

“What word best describes your pain?”

None (0),      Mild (1-3) ,      Moderate (4-6),      or      Severe (7-10)

6.2. Analgesic therapy No Yes (If yes, please provide details)

| Name of analgesic | Usage and Dosage | Start date                                                                                                                                                                                                          | Currently used?                                          | If it is no longer used, please provide end date                                                                                                                                                                    |
|-------------------|------------------|---------------------------------------------------------------------------------------------------------------------------------------------------------------------------------------------------------------------|----------------------------------------------------------|---------------------------------------------------------------------------------------------------------------------------------------------------------------------------------------------------------------------|
|                   |                  | <input type="checkbox"/> <input type="checkbox"/> (D) <input type="checkbox"/> <input type="checkbox"/> (M) <input type="checkbox"/> <input type="checkbox"/> <input type="checkbox"/> <input type="checkbox"/> (Y) | <input type="checkbox"/> Yes <input type="checkbox"/> No | <input type="checkbox"/> <input type="checkbox"/> (D) <input type="checkbox"/> <input type="checkbox"/> (M) <input type="checkbox"/> <input type="checkbox"/> <input type="checkbox"/> <input type="checkbox"/> (Y) |
|                   |                  | <input type="checkbox"/> <input type="checkbox"/> (D) <input type="checkbox"/> <input type="checkbox"/> (M) <input type="checkbox"/> <input type="checkbox"/> <input type="checkbox"/> <input type="checkbox"/> (Y) | <input type="checkbox"/> Yes <input type="checkbox"/> No | <input type="checkbox"/> <input type="checkbox"/> (D) <input type="checkbox"/> <input type="checkbox"/> (M) <input type="checkbox"/> <input type="checkbox"/> <input type="checkbox"/> <input type="checkbox"/> (Y) |
|                   |                  | <input type="checkbox"/> <input type="checkbox"/> (D) <input type="checkbox"/> <input type="checkbox"/> (M) <input type="checkbox"/> <input type="checkbox"/> <input type="checkbox"/> <input type="checkbox"/> (Y) | <input type="checkbox"/> Yes <input type="checkbox"/> No | <input type="checkbox"/> <input type="checkbox"/> (D) <input type="checkbox"/> <input type="checkbox"/> (M) <input type="checkbox"/> <input type="checkbox"/> <input type="checkbox"/> <input type="checkbox"/> (Y) |
|                   |                  | <input type="checkbox"/> <input type="checkbox"/> (D) <input type="checkbox"/> <input type="checkbox"/> (M) <input type="checkbox"/> <input type="checkbox"/> <input type="checkbox"/> <input type="checkbox"/> (Y) | <input type="checkbox"/> Yes <input type="checkbox"/> No | <input type="checkbox"/> <input type="checkbox"/> (D) <input type="checkbox"/> <input type="checkbox"/> (M) <input type="checkbox"/> <input type="checkbox"/> <input type="checkbox"/> <input type="checkbox"/> (Y) |
|                   |                  | <input type="checkbox"/> <input type="checkbox"/> (D) <input type="checkbox"/> <input type="checkbox"/> (M) <input type="checkbox"/> <input type="checkbox"/> <input type="checkbox"/> <input type="checkbox"/> (Y) | <input type="checkbox"/> Yes <input type="checkbox"/> No | <input type="checkbox"/> <input type="checkbox"/> (D) <input type="checkbox"/> <input type="checkbox"/> (M) <input type="checkbox"/> <input type="checkbox"/> <input type="checkbox"/> <input type="checkbox"/> (Y) |

Name of participant: \_\_\_\_\_

Participant ID: \_\_\_\_\_

6.3. Other therapy for pain control No Yes (If yes, please provide details)

| Name of treatment | Usage and dosage | Start date                                                                                                                                                                                                          | Currently used?                                          | If it is no longer used, please provide end date                                                                                                                                                                    |
|-------------------|------------------|---------------------------------------------------------------------------------------------------------------------------------------------------------------------------------------------------------------------|----------------------------------------------------------|---------------------------------------------------------------------------------------------------------------------------------------------------------------------------------------------------------------------|
|                   |                  | <input type="checkbox"/> <input type="checkbox"/> (D) <input type="checkbox"/> <input type="checkbox"/> (M) <input type="checkbox"/> <input type="checkbox"/> <input type="checkbox"/> <input type="checkbox"/> (Y) | <input type="checkbox"/> Yes <input type="checkbox"/> No | <input type="checkbox"/> <input type="checkbox"/> (D) <input type="checkbox"/> <input type="checkbox"/> (M) <input type="checkbox"/> <input type="checkbox"/> <input type="checkbox"/> <input type="checkbox"/> (Y) |
|                   |                  | <input type="checkbox"/> <input type="checkbox"/> (D) <input type="checkbox"/> <input type="checkbox"/> (M) <input type="checkbox"/> <input type="checkbox"/> <input type="checkbox"/> <input type="checkbox"/> (Y) | <input type="checkbox"/> Yes <input type="checkbox"/> No | <input type="checkbox"/> <input type="checkbox"/> (D) <input type="checkbox"/> <input type="checkbox"/> (M) <input type="checkbox"/> <input type="checkbox"/> <input type="checkbox"/> <input type="checkbox"/> (Y) |
|                   |                  | <input type="checkbox"/> <input type="checkbox"/> (D) <input type="checkbox"/> <input type="checkbox"/> (M) <input type="checkbox"/> <input type="checkbox"/> <input type="checkbox"/> <input type="checkbox"/> (Y) | <input type="checkbox"/> Yes <input type="checkbox"/> No | <input type="checkbox"/> <input type="checkbox"/> (D) <input type="checkbox"/> <input type="checkbox"/> (M) <input type="checkbox"/> <input type="checkbox"/> <input type="checkbox"/> <input type="checkbox"/> (Y) |
|                   |                  | <input type="checkbox"/> <input type="checkbox"/> (D) <input type="checkbox"/> <input type="checkbox"/> (M) <input type="checkbox"/> <input type="checkbox"/> <input type="checkbox"/> <input type="checkbox"/> (Y) | <input type="checkbox"/> Yes <input type="checkbox"/> No | <input type="checkbox"/> <input type="checkbox"/> (D) <input type="checkbox"/> <input type="checkbox"/> (M) <input type="checkbox"/> <input type="checkbox"/> <input type="checkbox"/> <input type="checkbox"/> (Y) |
|                   |                  | <input type="checkbox"/> <input type="checkbox"/> (D) <input type="checkbox"/> <input type="checkbox"/> (M) <input type="checkbox"/> <input type="checkbox"/> <input type="checkbox"/> <input type="checkbox"/> (Y) | <input type="checkbox"/> Yes <input type="checkbox"/> No | <input type="checkbox"/> <input type="checkbox"/> (D) <input type="checkbox"/> <input type="checkbox"/> (M) <input type="checkbox"/> <input type="checkbox"/> <input type="checkbox"/> <input type="checkbox"/> (Y) |

6.4. Frequency of breakthrough pain and rescue medication used in the past 24 hours

No Yes (If yes, please provide details)

| Onset time                                                                                                          | Intensity (NRS)          | Name, usage and dosage of rescue medication | Time administered                                                                                                   |
|---------------------------------------------------------------------------------------------------------------------|--------------------------|---------------------------------------------|---------------------------------------------------------------------------------------------------------------------|
| <input type="checkbox"/> <input type="checkbox"/> (Hour) <input type="checkbox"/> <input type="checkbox"/> (Minute) | <input type="checkbox"/> |                                             | <input type="checkbox"/> <input type="checkbox"/> (Hour) <input type="checkbox"/> <input type="checkbox"/> (Minute) |
| <input type="checkbox"/> <input type="checkbox"/> (Hour) <input type="checkbox"/> <input type="checkbox"/> (Minute) | <input type="checkbox"/> |                                             | <input type="checkbox"/> <input type="checkbox"/> (Hour) <input type="checkbox"/> <input type="checkbox"/> (Minute) |
| <input type="checkbox"/> <input type="checkbox"/> (Hour) <input type="checkbox"/> <input type="checkbox"/> (Minute) | <input type="checkbox"/> |                                             | <input type="checkbox"/> <input type="checkbox"/> (Hour) <input type="checkbox"/> <input type="checkbox"/> (Minute) |
| <input type="checkbox"/> <input type="checkbox"/> (Hour) <input type="checkbox"/> <input type="checkbox"/> (Minute) | <input type="checkbox"/> |                                             | <input type="checkbox"/> <input type="checkbox"/> (Hour) <input type="checkbox"/> <input type="checkbox"/> (Minute) |
| <input type="checkbox"/> <input type="checkbox"/> (Hour) <input type="checkbox"/> <input type="checkbox"/> (Minute) | <input type="checkbox"/> |                                             | <input type="checkbox"/> <input type="checkbox"/> (Hour) <input type="checkbox"/> <input type="checkbox"/> (Minute) |



Name of participant: \_\_\_\_\_

Participant ID: \_\_\_\_\_

7. Information from the perspective of Chinese medicine

7.1. Diagnostics in Chinese medicine

| Tongue Diagnosis                          |                                   |                                                                                                                                                                                                                        |
|-------------------------------------------|-----------------------------------|------------------------------------------------------------------------------------------------------------------------------------------------------------------------------------------------------------------------|
| Body                                      | Color <input type="checkbox"/>    | 1. Pale-red 2. Pale 3. Red 4. Crimson 5. Crimson and purple<br>6. Blue and purple 7. Pale and purple                                                                                                                   |
|                                           | Shape <input type="checkbox"/>    | 1. Normal 2. Enlarged without tooth marks 3. Enlarged with tooth marks<br>4. Swollen 5. Small and thin tongue                                                                                                          |
|                                           | Texture <input type="checkbox"/>  | 1. Normal 2. Tough 3. Delicate                                                                                                                                                                                         |
|                                           | Others                            | Speckles and Prickled <input type="checkbox"/> No <input type="checkbox"/> Yes Ecchymosis <input type="checkbox"/> No <input type="checkbox"/> Yes<br>Cracked <input type="checkbox"/> No <input type="checkbox"/> Yes |
| Coating                                   | Texture <input type="checkbox"/>  | 1. Thin coating 2. No coating 3. Little coating 4. Peeled coating<br>5. Thick coating 6. Greasy coating 7. Curd-like coating                                                                                           |
|                                           | Color <input type="checkbox"/>    | 1. White 2. Yellow 3. Grayish black                                                                                                                                                                                    |
|                                           | Moisture <input type="checkbox"/> | 1. Moist 2. Slippery 3. Dry 4. Coarse                                                                                                                                                                                  |
| Sublingual veins <input type="checkbox"/> |                                   | 1. Normal 2. Big cyanotic 3. Thin, short, pale                                                                                                                                                                         |

| Pulse Diagnosis <input type="checkbox"/> 0. Normal 1. Abnormal, please provide details <input type="checkbox"/> (Multiple choice)                                                                                                                                                                                                                                                                                                                                                                     |
|-------------------------------------------------------------------------------------------------------------------------------------------------------------------------------------------------------------------------------------------------------------------------------------------------------------------------------------------------------------------------------------------------------------------------------------------------------------------------------------------------------|
| 1. Floating pulse 2. Deep pulse 3. Slow pulse 4. Rapid pulse 5. Surging pulse 6. Thready pulse 7. Faint pulse<br>8. Scattered pulse 9. Deficient pulse 10. Excess pulse 11. Slippery pulse 12. Rough pulse 13. Long pulse 14. Short pulse<br>15. Wiry pulse 16. Hollow pulse 17. Tight pulse 18. Moderate pulse 19. Drum-skin pulse 20. Firm pulse 21. Weak pulse<br>22. Soggy pulse 23. Hidden pulse 24. Bouncing pulse 25. Hasty pulse 26. Knotted pulse 27. Intermittent pulse<br>28. Racing pulse |

Name of participant: \_\_\_\_\_

Participant ID: \_\_\_\_\_

| Other signs                             |                                                |                                                                                                                                                                                                 |
|-----------------------------------------|------------------------------------------------|-------------------------------------------------------------------------------------------------------------------------------------------------------------------------------------------------|
| Sleep <input type="checkbox"/>          |                                                | 1. Normal 2. Difficult to fall asleep 3. Easy to wake up<br>4. Keeping eyes open overnight 5. Lethargy 6. Drowsy                                                                                |
| Thirst <input type="checkbox"/>         |                                                | 1. Neither thirst nor desire for drinking water<br>2. Thirst with a desire to drink hot (warm) water<br>3. Thirst with a desire to drink cold water<br>3. Thirst without much drinking of water |
| Appetite <input type="checkbox"/>       |                                                | 1. Normal 2. Anorexia 3. Decline in appetite 4. Reduction of food intake<br>5. Polyphagia and frequent hunger 6. Hungry without a desire to eat                                                 |
| Taste in mouth <input type="checkbox"/> |                                                | 1. Normal 2. Bland 3. Bitter 4. Sweet 5. Sour 6. Salty 7. Puckery<br>8. Sticky and greasy                                                                                                       |
| Defecation                              | Frequency <input type="checkbox"/>             | 1. Normal 2. Constipation 3. Diarrhea 4. Chronic diarrhea<br>5. Diarrhea before dawn 6. Constipation and diarrhea alternately                                                                   |
|                                         | Quality <input type="checkbox"/>               | 1. Normal 2. Dry 3. Pulpy 4. Loose stool 5. Watery<br>6. Undigested food stuff in stools 7. At first dry and then loose stool<br>8. Alternate loose and dry stools                              |
|                                         | hematochezia <input type="checkbox"/>          | 1. No 2. Distant part bleeding 3. Near or new blood 4. Mucous bloody                                                                                                                            |
|                                         | Feeling of defecation <input type="checkbox"/> | 1. Normal 2. Unsmooth defecation 3. Tenesmus 4. Burning sensation in anus<br>5. Prolonged and uncontrolled diarrhea 6. Dropping of the anus                                                     |
| Urination                               | Color <input type="checkbox"/>                 | 1. Normal 2. Clear and profuse 3. Scanty deep yellow                                                                                                                                            |
|                                         | Frequency <input type="checkbox"/>             | 1. Normal 2. Frequent 3. Increased nocturia 4. Difficult in urination<br>5. Retention of urine                                                                                                  |
|                                         | Amount <input type="checkbox"/>                | 1. Normal 2. Increased 3. Decreased                                                                                                                                                             |
|                                         | Feeling of urination <input type="checkbox"/>  | 1. Normal 2. Stranguria 3. Dribble of urine 4. Incontinence 5. Enuresis                                                                                                                         |

Name of participant: \_\_\_\_\_

Participant ID: \_\_\_\_\_

7.2. Chinese medicine therapies? No Yes (If yes, please provide details)

| Name of treatment | Usage and dosage | Start date           | Currently used?                                          | If it is no longer used, please provide end date |
|-------------------|------------------|----------------------|----------------------------------------------------------|--------------------------------------------------|
|                   |                  | □□ (D) □□(M) □□□□(Y) | <input type="checkbox"/> No <input type="checkbox"/> Yes | □□ (D) □□(M) □□□□(Y)                             |
|                   |                  | □□ (D) □□(M) □□□□(Y) | <input type="checkbox"/> No <input type="checkbox"/> Yes | □□ (D) □□(M) □□□□(Y)                             |
|                   |                  | □□ (D) □□(M) □□□□(Y) | <input type="checkbox"/> No <input type="checkbox"/> Yes | □□ (D) □□(M) □□□□(Y)                             |
|                   |                  | □□ (D) □□(M) □□□□(Y) | <input type="checkbox"/> No <input type="checkbox"/> Yes | □□ (D) □□(M) □□□□(Y)                             |
|                   |                  | □□ (D) □□(M) □□□□(Y) | <input type="checkbox"/> No <input type="checkbox"/> Yes | □□ (D) □□(M) □□□□(Y)                             |
|                   |                  | □□ (D) □□(M) □□□□(Y) | <input type="checkbox"/> No <input type="checkbox"/> Yes | □□ (D) □□(M) □□□□(Y)                             |

Name of participant: \_\_\_\_\_

Participant ID: \_\_\_\_\_

## **Treatment records**

1. Drop-out: Did the participant drop out:

No;

Yes, please fill in the form “Summary of Trial Completion” on Page 39.

2. Medications: Did the participant take any medication during the period:

No;

Yes, please fill in the form “Records of Medications and Other Therapies” on Page 40.

3. Adverse events: Is there any adverse event in the treatment period:

No;

Yes, please fill in the form “Reports of Adverse Events” on Page 41.

Name of participant: \_\_\_\_\_

Participant ID: \_\_\_\_\_

**Acupuncture treatment records (only need to fill in for the treatment group)**

**Day 1 (1<sup>st</sup> Treatment)**

Date: □□ (Day) □□(Month) □□□□(Year)    Duration of the therapies: □□:□□ - □□:□□    Signature of the acupuncturist: \_\_\_\_\_

|                                                                                                            |                                                                                                                                |
|------------------------------------------------------------------------------------------------------------|--------------------------------------------------------------------------------------------------------------------------------|
| Acupuncture points<br>(Please specify: L- Left, R- Right)                                                  |                                                                                                                                |
| Needle<br>(diameter × length) (mm)                                                                         |                                                                                                                                |
| Reason for acupuncture point selection                                                                     |                                                                                                                                |
| Manipulation<br>(Reinforcing and reducing,<br>electro-acupuncture, or warming needle<br>moxibustion, etc.) |                                                                                                                                |
| Management of accidents during the<br>treatment (if applicable)                                            | (Briefly describe the process and related treatment for adverse events here, and fill in the form “Reports of Adverse Events”) |
| Note                                                                                                       |                                                                                                                                |

Name of participant: \_\_\_\_\_

Participant ID: \_\_\_\_\_

**Day 2 (2<sup>nd</sup> Treatment)**

Date: □□ (Day) □□(Month) □□□□(Year)    Duration of the therapies: □□:□□ - □□:□□    Signature of the acupuncturist: \_\_\_\_\_

|                                                                                                            |                                                                                                                                |
|------------------------------------------------------------------------------------------------------------|--------------------------------------------------------------------------------------------------------------------------------|
| Acupuncture points<br>(Please specify: L- Left, R- Right)                                                  |                                                                                                                                |
| Needle<br>(diameter × length) (mm)                                                                         |                                                                                                                                |
| Reason for acupuncture point selection                                                                     |                                                                                                                                |
| Manipulation<br>(Reinforcing and reducing,<br>electro-acupuncture, or warming needle<br>moxibustion, etc.) |                                                                                                                                |
| Management of accidents during the<br>treatment (if applicable)                                            | (Briefly describe the process and related treatment for adverse events here, and fill in the form “Reports of Adverse Events”) |
| Note                                                                                                       |                                                                                                                                |

Name of participant: \_\_\_\_\_

Participant ID: \_\_\_\_\_

**Day 4 (3<sup>rd</sup> Treatment)**

Date: □□ (Day) □□(Month) □□□□(Year)    Duration of the therapies: □□:□□ - □□:□□    Signature of the acupuncturist: \_\_\_\_\_

|                                                                                                            |                                                                                                                                |
|------------------------------------------------------------------------------------------------------------|--------------------------------------------------------------------------------------------------------------------------------|
| Acupuncture points<br>(Please specify: L- Left, R- Right)                                                  |                                                                                                                                |
| Needle<br>(diameter × length) (mm)                                                                         |                                                                                                                                |
| Reason for acupuncture point selection                                                                     |                                                                                                                                |
| Manipulation<br>(Reinforcing and reducing,<br>electro-acupuncture, or warming needle<br>moxibustion, etc.) |                                                                                                                                |
| Management of accidents during the<br>treatment (if applicable)                                            | (Briefly describe the process and related treatment for adverse events here, and fill in the form “Reports of Adverse Events”) |
| Note                                                                                                       |                                                                                                                                |

Name of participant: \_\_\_\_\_

Participant ID: \_\_\_\_\_

**Day 6 (4<sup>th</sup> Treatment)**

Date: □□ (Day) □□(Month) □□□□(Year)    Duration of the therapies: □□:□□ - □□:□□    Signature of the acupuncturist: \_\_\_\_\_

|                                                                                                            |                                                                                                                                |
|------------------------------------------------------------------------------------------------------------|--------------------------------------------------------------------------------------------------------------------------------|
| Acupuncture points<br>(Please specify: L- Left, R- Right)                                                  |                                                                                                                                |
| Needle<br>(diameter × length) (mm)                                                                         |                                                                                                                                |
| Reason for acupuncture point selection                                                                     |                                                                                                                                |
| Manipulation<br>(Reinforcing and reducing,<br>electro-acupuncture, or warming needle<br>moxibustion, etc.) |                                                                                                                                |
| Management of accidents during the<br>treatment (if applicable)                                            | (Briefly describe the process and related treatment for adverse events here, and fill in the form “Reports of Adverse Events”) |
| Note                                                                                                       |                                                                                                                                |



Name of participant: \_\_\_\_\_

Participant ID: \_\_\_\_\_

**Analgesic treatment records (need to fill in for both groups)**

**Day 1**

Analgesic therapy No Yes (If yes, please provide details)

| Name of analgesic | Usage and Dosage | Start date           | Currently used?                                          | If it is no longer used, please provide end date |
|-------------------|------------------|----------------------|----------------------------------------------------------|--------------------------------------------------|
|                   |                  | □□ (D) □□(M) □□□□(Y) | <input type="checkbox"/> Yes <input type="checkbox"/> No | □□ (D) □□(M) □□□□(Y)                             |
|                   |                  | □□ (D) □□(M) □□□□(Y) | <input type="checkbox"/> Yes <input type="checkbox"/> No | □□ (D) □□(M) □□□□(Y)                             |
|                   |                  | □□ (D) □□(M) □□□□(Y) | <input type="checkbox"/> Yes <input type="checkbox"/> No | □□ (D) □□(M) □□□□(Y)                             |
|                   |                  | □□ (D) □□(M) □□□□(Y) | <input type="checkbox"/> Yes <input type="checkbox"/> No | □□ (D) □□(M) □□□□(Y)                             |
|                   |                  | □□ (D) □□(M) □□□□(Y) | <input type="checkbox"/> Yes <input type="checkbox"/> No | □□ (D) □□(M) □□□□(Y)                             |

Other therapy for pain control No Yes (If yes, please provide details)

| Name of treatment | Usage and dosage | Start date           | Currently used?                                          | If it is no longer used, please provide end date |
|-------------------|------------------|----------------------|----------------------------------------------------------|--------------------------------------------------|
|                   |                  | □□ (D) □□(M) □□□□(Y) | <input type="checkbox"/> Yes <input type="checkbox"/> No | □□ (D) □□(M) □□□□(Y)                             |
|                   |                  | □□ (D) □□(M) □□□□(Y) | <input type="checkbox"/> Yes <input type="checkbox"/> No | □□ (D) □□(M) □□□□(Y)                             |
|                   |                  | □□ (D) □□(M) □□□□(Y) | <input type="checkbox"/> Yes <input type="checkbox"/> No | □□ (D) □□(M) □□□□(Y)                             |

Frequency of breakthrough pain and rescue medication used in the past 24 hours No Yes (If yes, please provide details)

| Onset time           | Intensity (NRS)          | Name, usage and dosage of rescue medication | Time administered    |
|----------------------|--------------------------|---------------------------------------------|----------------------|
| □□ (Hour) □□(Minute) | <input type="checkbox"/> |                                             | □□ (Hour) □□(Minute) |
| □□ (Hour) □□(Minute) | <input type="checkbox"/> |                                             | □□ (Hour) □□(Minute) |
| □□ (Hour) □□(Minute) | <input type="checkbox"/> |                                             | □□ (Hour) □□(Minute) |
| □□ (Hour) □□(Minute) | <input type="checkbox"/> |                                             | □□ (Hour) □□(Minute) |
| □□ (Hour) □□(Minute) | <input type="checkbox"/> |                                             | □□ (Hour) □□(Minute) |

Signature of investigator: \_\_\_\_\_

Date: \_\_\_\_\_

Name of participant: \_\_\_\_\_

Participant ID: \_\_\_\_\_

**Day 2**

Analgesic therapy No Yes (If yes, please provide details)

| Name of analgesic | Usage and Dosage | Start date           | Currently used?                                          | If it is no longer used, please provide end date |
|-------------------|------------------|----------------------|----------------------------------------------------------|--------------------------------------------------|
|                   |                  | □□ (D) □□(M) □□□□(Y) | <input type="checkbox"/> Yes <input type="checkbox"/> No | □□ (D) □□(M) □□□□(Y)                             |
|                   |                  | □□ (D) □□(M) □□□□(Y) | <input type="checkbox"/> Yes <input type="checkbox"/> No | □□ (D) □□(M) □□□□(Y)                             |
|                   |                  | □□ (D) □□(M) □□□□(Y) | <input type="checkbox"/> Yes <input type="checkbox"/> No | □□ (D) □□(M) □□□□(Y)                             |
|                   |                  | □□ (D) □□(M) □□□□(Y) | <input type="checkbox"/> Yes <input type="checkbox"/> No | □□ (D) □□(M) □□□□(Y)                             |
|                   |                  | □□ (D) □□(M) □□□□(Y) | <input type="checkbox"/> Yes <input type="checkbox"/> No | □□ (D) □□(M) □□□□(Y)                             |

Other therapy for pain control No Yes (If yes, please provide details)

| Name of treatment | Usage and dosage | Start date           | Currently used?                                          | If it is no longer used, please provide end date |
|-------------------|------------------|----------------------|----------------------------------------------------------|--------------------------------------------------|
|                   |                  | □□ (D) □□(M) □□□□(Y) | <input type="checkbox"/> Yes <input type="checkbox"/> No | □□ (D) □□(M) □□□□(Y)                             |
|                   |                  | □□ (D) □□(M) □□□□(Y) | <input type="checkbox"/> Yes <input type="checkbox"/> No | □□ (D) □□(M) □□□□(Y)                             |
|                   |                  | □□ (D) □□(M) □□□□(Y) | <input type="checkbox"/> Yes <input type="checkbox"/> No | □□ (D) □□(M) □□□□(Y)                             |

Frequency of breakthrough pain and rescue medication used in the past 24 hours No Yes (If yes, please provide details)

| Onset time           | Intensity (NRS)          | Name, usage and dosage of rescue medication | Time administered    |
|----------------------|--------------------------|---------------------------------------------|----------------------|
| □□ (Hour) □□(Minute) | <input type="checkbox"/> |                                             | □□ (Hour) □□(Minute) |
| □□ (Hour) □□(Minute) | <input type="checkbox"/> |                                             | □□ (Hour) □□(Minute) |
| □□ (Hour) □□(Minute) | <input type="checkbox"/> |                                             | □□ (Hour) □□(Minute) |
| □□ (Hour) □□(Minute) | <input type="checkbox"/> |                                             | □□ (Hour) □□(Minute) |
| □□ (Hour) □□(Minute) | <input type="checkbox"/> |                                             | □□ (Hour) □□(Minute) |

Signature of investigator: \_\_\_\_\_

Date: \_\_\_\_\_

Name of participant: \_\_\_\_\_

Participant ID: \_\_\_\_\_

**Day 3**

Analgesic therapy No Yes (If yes, please provide details)

| Name of analgesic | Usage and Dosage | Start date           | Currently used?                                          | If it is no longer used, please provide end date |
|-------------------|------------------|----------------------|----------------------------------------------------------|--------------------------------------------------|
|                   |                  | □□ (D) □□(M) □□□□(Y) | <input type="checkbox"/> Yes <input type="checkbox"/> No | □□ (D) □□(M) □□□□(Y)                             |
|                   |                  | □□ (D) □□(M) □□□□(Y) | <input type="checkbox"/> Yes <input type="checkbox"/> No | □□ (D) □□(M) □□□□(Y)                             |
|                   |                  | □□ (D) □□(M) □□□□(Y) | <input type="checkbox"/> Yes <input type="checkbox"/> No | □□ (D) □□(M) □□□□(Y)                             |
|                   |                  | □□ (D) □□(M) □□□□(Y) | <input type="checkbox"/> Yes <input type="checkbox"/> No | □□ (D) □□(M) □□□□(Y)                             |
|                   |                  | □□ (D) □□(M) □□□□(Y) | <input type="checkbox"/> Yes <input type="checkbox"/> No | □□ (D) □□(M) □□□□(Y)                             |

Other therapy for pain control No Yes (If yes, please provide details)

| Name of treatment | Usage and dosage | Start date           | Currently used?                                          | If it is no longer used, please provide end date |
|-------------------|------------------|----------------------|----------------------------------------------------------|--------------------------------------------------|
|                   |                  | □□ (D) □□(M) □□□□(Y) | <input type="checkbox"/> Yes <input type="checkbox"/> No | □□ (D) □□(M) □□□□(Y)                             |
|                   |                  | □□ (D) □□(M) □□□□(Y) | <input type="checkbox"/> Yes <input type="checkbox"/> No | □□ (D) □□(M) □□□□(Y)                             |
|                   |                  | □□ (D) □□(M) □□□□(Y) | <input type="checkbox"/> Yes <input type="checkbox"/> No | □□ (D) □□(M) □□□□(Y)                             |

Frequency of breakthrough pain and rescue medication used in the past 24 hours No Yes (If yes, please provide details)

| Onset time           | Intensity (NRS)          | Name, usage and dosage of rescue medication | Time administered    |
|----------------------|--------------------------|---------------------------------------------|----------------------|
| □□ (Hour) □□(Minute) | <input type="checkbox"/> |                                             | □□ (Hour) □□(Minute) |
| □□ (Hour) □□(Minute) | <input type="checkbox"/> |                                             | □□ (Hour) □□(Minute) |
| □□ (Hour) □□(Minute) | <input type="checkbox"/> |                                             | □□ (Hour) □□(Minute) |
| □□ (Hour) □□(Minute) | <input type="checkbox"/> |                                             | □□ (Hour) □□(Minute) |
| □□ (Hour) □□(Minute) | <input type="checkbox"/> |                                             | □□ (Hour) □□(Minute) |

Signature of investigator: \_\_\_\_\_

Date: \_\_\_\_\_

Name of participant: \_\_\_\_\_

Participant ID: \_\_\_\_\_

**Day 4**

Analgesic therapy No Yes (If yes, please provide details)

| Name of analgesic | Usage and Dosage | Start date           | Currently used?                                          | If it is no longer used, please provide end date |
|-------------------|------------------|----------------------|----------------------------------------------------------|--------------------------------------------------|
|                   |                  | □□ (D) □□(M) □□□□(Y) | <input type="checkbox"/> Yes <input type="checkbox"/> No | □□ (D) □□(M) □□□□(Y)                             |
|                   |                  | □□ (D) □□(M) □□□□(Y) | <input type="checkbox"/> Yes <input type="checkbox"/> No | □□ (D) □□(M) □□□□(Y)                             |
|                   |                  | □□ (D) □□(M) □□□□(Y) | <input type="checkbox"/> Yes <input type="checkbox"/> No | □□ (D) □□(M) □□□□(Y)                             |
|                   |                  | □□ (D) □□(M) □□□□(Y) | <input type="checkbox"/> Yes <input type="checkbox"/> No | □□ (D) □□(M) □□□□(Y)                             |
|                   |                  | □□ (D) □□(M) □□□□(Y) | <input type="checkbox"/> Yes <input type="checkbox"/> No | □□ (D) □□(M) □□□□(Y)                             |

Other therapy for pain control No Yes (If yes, please provide details)

| Name of treatment | Usage and dosage | Start date           | Currently used?                                          | If it is no longer used, please provide end date |
|-------------------|------------------|----------------------|----------------------------------------------------------|--------------------------------------------------|
|                   |                  | □□ (D) □□(M) □□□□(Y) | <input type="checkbox"/> Yes <input type="checkbox"/> No | □□ (D) □□(M) □□□□(Y)                             |
|                   |                  | □□ (D) □□(M) □□□□(Y) | <input type="checkbox"/> Yes <input type="checkbox"/> No | □□ (D) □□(M) □□□□(Y)                             |
|                   |                  | □□ (D) □□(M) □□□□(Y) | <input type="checkbox"/> Yes <input type="checkbox"/> No | □□ (D) □□(M) □□□□(Y)                             |

Frequency of breakthrough pain and rescue medication used in the past 24 hours No Yes (If yes, please provide details)

| Onset time           | Intensity (NRS)          | Name, usage and dosage of rescue medication | Time administered    |
|----------------------|--------------------------|---------------------------------------------|----------------------|
| □□ (Hour) □□(Minute) | <input type="checkbox"/> |                                             | □□ (Hour) □□(Minute) |
| □□ (Hour) □□(Minute) | <input type="checkbox"/> |                                             | □□ (Hour) □□(Minute) |
| □□ (Hour) □□(Minute) | <input type="checkbox"/> |                                             | □□ (Hour) □□(Minute) |
| □□ (Hour) □□(Minute) | <input type="checkbox"/> |                                             | □□ (Hour) □□(Minute) |
| □□ (Hour) □□(Minute) | <input type="checkbox"/> |                                             | □□ (Hour) □□(Minute) |

Signature of investigator: \_\_\_\_\_

Date: \_\_\_\_\_

Name of participant: \_\_\_\_\_

Participant ID: \_\_\_\_\_

**Day 5**

Analgesic therapy No Yes (If yes, please provide details)

| Name of analgesic | Usage and Dosage | Start date           | Currently used?                                          | If it is no longer used, please provide end date |
|-------------------|------------------|----------------------|----------------------------------------------------------|--------------------------------------------------|
|                   |                  | □□ (D) □□(M) □□□□(Y) | <input type="checkbox"/> Yes <input type="checkbox"/> No | □□ (D) □□(M) □□□□(Y)                             |
|                   |                  | □□ (D) □□(M) □□□□(Y) | <input type="checkbox"/> Yes <input type="checkbox"/> No | □□ (D) □□(M) □□□□(Y)                             |
|                   |                  | □□ (D) □□(M) □□□□(Y) | <input type="checkbox"/> Yes <input type="checkbox"/> No | □□ (D) □□(M) □□□□(Y)                             |
|                   |                  | □□ (D) □□(M) □□□□(Y) | <input type="checkbox"/> Yes <input type="checkbox"/> No | □□ (D) □□(M) □□□□(Y)                             |
|                   |                  | □□ (D) □□(M) □□□□(Y) | <input type="checkbox"/> Yes <input type="checkbox"/> No | □□ (D) □□(M) □□□□(Y)                             |

Other therapy for pain control No Yes (If yes, please provide details)

| Name of treatment | Usage and dosage | Start date           | Currently used?                                          | If it is no longer used, please provide end date |
|-------------------|------------------|----------------------|----------------------------------------------------------|--------------------------------------------------|
|                   |                  | □□ (D) □□(M) □□□□(Y) | <input type="checkbox"/> Yes <input type="checkbox"/> No | □□ (D) □□(M) □□□□(Y)                             |
|                   |                  | □□ (D) □□(M) □□□□(Y) | <input type="checkbox"/> Yes <input type="checkbox"/> No | □□ (D) □□(M) □□□□(Y)                             |
|                   |                  | □□ (D) □□(M) □□□□(Y) | <input type="checkbox"/> Yes <input type="checkbox"/> No | □□ (D) □□(M) □□□□(Y)                             |

Frequency of breakthrough pain and rescue medication used in the past 24 hours No Yes (If yes, please provide details)

| Onset time           | Intensity (NRS)          | Name, usage and dosage of rescue medication | Time administered    |
|----------------------|--------------------------|---------------------------------------------|----------------------|
| □□ (Hour) □□(Minute) | <input type="checkbox"/> |                                             | □□ (Hour) □□(Minute) |
| □□ (Hour) □□(Minute) | <input type="checkbox"/> |                                             | □□ (Hour) □□(Minute) |
| □□ (Hour) □□(Minute) | <input type="checkbox"/> |                                             | □□ (Hour) □□(Minute) |
| □□ (Hour) □□(Minute) | <input type="checkbox"/> |                                             | □□ (Hour) □□(Minute) |
| □□ (Hour) □□(Minute) | <input type="checkbox"/> |                                             | □□ (Hour) □□(Minute) |

Signature of investigator: \_\_\_\_\_

Date: \_\_\_\_\_

Name of participant: \_\_\_\_\_

Participant ID: \_\_\_\_\_

**Day 6**

Analgesic therapy No Yes (If yes, please provide details)

| Name of analgesic | Usage and Dosage | Starting date        | Currently used?                                          | If it is no longer used, please provide end date |
|-------------------|------------------|----------------------|----------------------------------------------------------|--------------------------------------------------|
|                   |                  | □□ (D) □□(M) □□□□(Y) | <input type="checkbox"/> Yes <input type="checkbox"/> No | □□ (D) □□(M) □□□□(Y)                             |
|                   |                  | □□ (D) □□(M) □□□□(Y) | <input type="checkbox"/> Yes <input type="checkbox"/> No | □□ (D) □□(M) □□□□(Y)                             |
|                   |                  | □□ (D) □□(M) □□□□(Y) | <input type="checkbox"/> Yes <input type="checkbox"/> No | □□ (D) □□(M) □□□□(Y)                             |
|                   |                  | □□ (D) □□(M) □□□□(Y) | <input type="checkbox"/> Yes <input type="checkbox"/> No | □□ (D) □□(M) □□□□(Y)                             |
|                   |                  | □□ (D) □□(M) □□□□(Y) | <input type="checkbox"/> Yes <input type="checkbox"/> No | □□ (D) □□(M) □□□□(Y)                             |

Other therapy for pain control No Yes (If yes, please provide details)

| Name of treatment | Usage and dosage | Start date           | Currently used?                                          | If it is no longer used, please provide end date |
|-------------------|------------------|----------------------|----------------------------------------------------------|--------------------------------------------------|
|                   |                  | □□ (D) □□(M) □□□□(Y) | <input type="checkbox"/> Yes <input type="checkbox"/> No | □□ (D) □□(M) □□□□(Y)                             |
|                   |                  | □□ (D) □□(M) □□□□(Y) | <input type="checkbox"/> Yes <input type="checkbox"/> No | □□ (D) □□(M) □□□□(Y)                             |
|                   |                  | □□ (D) □□(M) □□□□(Y) | <input type="checkbox"/> Yes <input type="checkbox"/> No | □□ (D) □□(M) □□□□(Y)                             |

Frequency of breakthrough pain and rescue medication used in the past 24 hours No Yes (If yes, please provide details)

| Onset time           | Intensity (NRS)          | Name, usage and dosage of rescue medication | Time administered    |
|----------------------|--------------------------|---------------------------------------------|----------------------|
| □□ (Hour) □□(Minute) | <input type="checkbox"/> |                                             | □□ (Hour) □□(Minute) |
| □□ (Hour) □□(Minute) | <input type="checkbox"/> |                                             | □□ (Hour) □□(Minute) |
| □□ (Hour) □□(Minute) | <input type="checkbox"/> |                                             | □□ (Hour) □□(Minute) |
| □□ (Hour) □□(Minute) | <input type="checkbox"/> |                                             | □□ (Hour) □□(Minute) |
| □□ (Hour) □□(Minute) | <input type="checkbox"/> |                                             | □□ (Hour) □□(Minute) |

Signature of investigator: \_\_\_\_\_

Date: \_\_\_\_\_

Name of participant: \_\_\_\_\_

Participant ID: \_\_\_\_\_

**Day 7**

Analgesic therapy No Yes (If yes, please provide details)

| Name of analgesic | Usage and Dosage | Start date           | Currently used?                                          | If it is no longer used, please provide end date |
|-------------------|------------------|----------------------|----------------------------------------------------------|--------------------------------------------------|
|                   |                  | □□ (D) □□(M) □□□□(Y) | <input type="checkbox"/> Yes <input type="checkbox"/> No | □□ (D) □□(M) □□□□(Y)                             |
|                   |                  | □□ (D) □□(M) □□□□(Y) | <input type="checkbox"/> Yes <input type="checkbox"/> No | □□ (D) □□(M) □□□□(Y)                             |
|                   |                  | □□ (D) □□(M) □□□□(Y) | <input type="checkbox"/> Yes <input type="checkbox"/> No | □□ (D) □□(M) □□□□(Y)                             |
|                   |                  | □□ (D) □□(M) □□□□(Y) | <input type="checkbox"/> Yes <input type="checkbox"/> No | □□ (D) □□(M) □□□□(Y)                             |
|                   |                  | □□ (D) □□(M) □□□□(Y) | <input type="checkbox"/> Yes <input type="checkbox"/> No | □□ (D) □□(M) □□□□(Y)                             |

Other therapy for pain control No Yes (If yes, please provide details)

| Name of treatment | Usage and dosage | Start date           | Currently used?                                          | If it is no longer used, please provide end date |
|-------------------|------------------|----------------------|----------------------------------------------------------|--------------------------------------------------|
|                   |                  | □□ (D) □□(M) □□□□(Y) | <input type="checkbox"/> Yes <input type="checkbox"/> No | □□ (D) □□(M) □□□□(Y)                             |
|                   |                  | □□ (D) □□(M) □□□□(Y) | <input type="checkbox"/> Yes <input type="checkbox"/> No | □□ (D) □□(M) □□□□(Y)                             |
|                   |                  | □□ (D) □□(M) □□□□(Y) | <input type="checkbox"/> Yes <input type="checkbox"/> No | □□ (D) □□(M) □□□□(Y)                             |

Frequency of breakthrough pain and rescue medication used in the past 24 hours No Yes (If yes, please provide details)

| Onset time           | Intensity (NRS)          | Name, usage and dosage of rescue medication | Time administered    |
|----------------------|--------------------------|---------------------------------------------|----------------------|
| □□ (Hour) □□(Minute) | <input type="checkbox"/> |                                             | □□ (Hour) □□(Minute) |
| □□ (Hour) □□(Minute) | <input type="checkbox"/> |                                             | □□ (Hour) □□(Minute) |
| □□ (Hour) □□(Minute) | <input type="checkbox"/> |                                             | □□ (Hour) □□(Minute) |
| □□ (Hour) □□(Minute) | <input type="checkbox"/> |                                             | □□ (Hour) □□(Minute) |
| □□ (Hour) □□(Minute) | <input type="checkbox"/> |                                             | □□ (Hour) □□(Minute) |

Signature of investigator: \_\_\_\_\_

Date: \_\_\_\_\_

Name of participant: \_\_\_\_\_

Participant ID: \_\_\_\_\_

## Pain assessment records

### Opioid titration period

**Day 1**

Evaluation time  (Hour)  (Minute)

Score on Numerical rating scale

- Verbal: "What number describes your pain from 0 (no pain) to 10 (worst pain you can imagine)?"
- Written: "Circle the number that describes your pain."

0    1    2    3    4    5    6    7    8    9    10  
No pain Worst pain you can imagine

Categorical scale:

"What word best describes your pain?"

None (0),            Mild (1-3) ,            Moderate (4-6),            or            Severe (7-10)

Evaluation time  (Hour)  (Minute)

Score on Numerical rating scale

- Verbal: "What number describes your pain from 0 (no pain) to 10 (worst pain you can imagine)?"
- Written: "Circle the number that describes your pain."

0    1    2    3    4    5    6    7    8    9    10  
No pain Worst pain you can imagine

Categorical scale:

"What word best describes your pain?"

None (0),            Mild (1-3) ,            Moderate (4-6),            or            Severe (7-10)

Signature of investigator: \_\_\_\_\_

Date: \_\_\_\_\_











Name of participant: \_\_\_\_\_

Participant ID: \_\_\_\_\_

**Day 6**

Evaluation time  (Hour)  (Minute)

Score on Numerical rating scale

- Verbal: “What number describes your pain from 0 (no pain) to 10 (worst pain you can imagine)?”
- Written: “Circle the number that describes your pain.”

0    1    2    3    4    5    6    7    8    9    10  
No pain Worst pain you can imagine

Categorical scale:

“What word best describes your pain?”

None (0),            Mild (1-3) ,            Moderate (4-6),            or            Severe (7-10)

Evaluation time  (Hour)  (Minute)

Score on Numerical rating scale

- Verbal: “What number describes your pain from 0 (no pain) to 10 (worst pain you can imagine)?”
- Written: “Circle the number that describes your pain.”

0    1    2    3    4    5    6    7    8    9    10  
No pain Worst pain you can imagine

Categorical scale:

“What word best describes your pain?”

None (0),            Mild (1-3) ,            Moderate (4-6),            or            Severe (7-10)

Signature of investigator: \_\_\_\_\_

Date: \_\_\_\_\_



Name of participant: \_\_\_\_\_

Participant ID: \_\_\_\_\_

Diagnostics in Chinese medicine

| Tongue Diagnosis                          |                                   |                                                                                                                                                                                                                        |
|-------------------------------------------|-----------------------------------|------------------------------------------------------------------------------------------------------------------------------------------------------------------------------------------------------------------------|
| Body                                      | Color <input type="checkbox"/>    | 1. Pale-red 2. Pale 3. Red 4. Crimson 5. Crimson and purple<br>6. Blue and purple 7. Pale and purple                                                                                                                   |
|                                           | Shape <input type="checkbox"/>    | 1. Normal 2. Enlarged without tooth marks 3. Enlarged with tooth marks<br>4. Swollen 5. Small and thin tongue                                                                                                          |
|                                           | Texture <input type="checkbox"/>  | 1. Normal 2. Tough 3. Delicate                                                                                                                                                                                         |
|                                           | Others                            | Speckles and Prickled <input type="checkbox"/> No <input type="checkbox"/> Yes Ecchymosis <input type="checkbox"/> No <input type="checkbox"/> Yes<br>Cracked <input type="checkbox"/> No <input type="checkbox"/> Yes |
| Coating                                   | Texture <input type="checkbox"/>  | 1. Thin coating 2. No coating 3. Little coating 4. Peeled coating<br>5. Thick coating 6. Greasy coating 7. Curd-like coating                                                                                           |
|                                           | Color <input type="checkbox"/>    | 1. White 2. Yellow 3. Grayish black                                                                                                                                                                                    |
|                                           | Moisture <input type="checkbox"/> | 1. Moist 2. Slippery 3. Dry 4. Coarse                                                                                                                                                                                  |
| Sublingual veins <input type="checkbox"/> |                                   | 1. Normal 2. Big cyanotic 3. Thin, short, pale                                                                                                                                                                         |

| Pulse Diagnosis <input type="checkbox"/> 0. Normal 1. Abnormal, please provide details <input type="checkbox"/> (Multiple choice)                                                                                                                                                                                                                                                                                                                                                                     |
|-------------------------------------------------------------------------------------------------------------------------------------------------------------------------------------------------------------------------------------------------------------------------------------------------------------------------------------------------------------------------------------------------------------------------------------------------------------------------------------------------------|
| 1. Floating pulse 2. Deep pulse 3. Slow pulse 4. Rapid pulse 5. Surging pulse 6. Thready pulse 7. Faint pulse<br>8. Scattered pulse 9. Deficient pulse 10. Excess pulse 11. Slippery pulse 12. Rough pulse 13. Long pulse 14. Short pulse<br>15. Wiry pulse 16. Hollow pulse 17. Tight pulse 18. Moderate pulse 19. Drum-skin pulse 20. Firm pulse 21. Weak pulse<br>22. Soggy pulse 23. Hidden pulse 24. Bouncing pulse 25. Hasty pulse 26. Knotted pulse 27. Intermittent pulse<br>28. Racing pulse |

Name of participant: \_\_\_\_\_

Participant ID: \_\_\_\_\_

| Other signs                             |                                                                                                                                                                                                 |                                                                                                                                                                    |
|-----------------------------------------|-------------------------------------------------------------------------------------------------------------------------------------------------------------------------------------------------|--------------------------------------------------------------------------------------------------------------------------------------------------------------------|
| Sleep <input type="checkbox"/>          | 1. Normal 2. Difficult to fall asleep 3. Easy to wake up<br>4. Keeping eyes open overnight 5. Lethargy 6. Drowsy                                                                                |                                                                                                                                                                    |
| Thirst <input type="checkbox"/>         | 1. Neither thirst nor desire for drinking water<br>2. Thirst with a desire to drink hot (warm) water<br>3. Thirst with a desire to drink cold water<br>3. Thirst without much drinking of water |                                                                                                                                                                    |
| Appetite <input type="checkbox"/>       | 1. Normal 2. Anorexia 3. Declined appetite 4. Reduction of food intake<br>5. Polyphagia and frequent hunger 6. Hungry without a desire to eat                                                   |                                                                                                                                                                    |
| Taste in mouth <input type="checkbox"/> | 1. Normal 2. Bland 3. Bitter 4. Sweet 5. Sour 6. Salty 7. Puckery<br>8. Sticky and greasy                                                                                                       |                                                                                                                                                                    |
| Defecation                              | Frequency <input type="checkbox"/>                                                                                                                                                              | 1. Normal 2. Constipation 3. Diarrhea 4. Chronic diarrhea<br>5. Diarrhea before dawn 6. Constipation and diarrhea alternately                                      |
|                                         | Quality <input type="checkbox"/>                                                                                                                                                                | 1. Normal 2. Dry 3. Pulpy 4. Loose stool 5. Watery<br>6. Undigested food stuff in stools 7. At first dry and then loose stool<br>8. Alternate loose and dry stools |
|                                         | hematochezia <input type="checkbox"/>                                                                                                                                                           | 1. No 2. Distant part bleeding 3. Near or new blood 4. Mucous bloody                                                                                               |
|                                         | Feeling of defecation <input type="checkbox"/>                                                                                                                                                  | 1. Normal 2. Unsmooth defecation 3. Tenesmus 4. Burning sensation in anus<br>5. Prolonged and uncontrolled diarrhea 6. Dropping of the anus                        |
| Urination                               | Color <input type="checkbox"/>                                                                                                                                                                  | 1. Normal 2. Clear and profuse 3. Scanty deep yellow                                                                                                               |
|                                         | Frequency <input type="checkbox"/>                                                                                                                                                              | 1. Normal 2. Frequent 3. Increased nocturia 4. Difficulty in urination<br>5. Retention of urine                                                                    |
|                                         | Amount <input type="checkbox"/>                                                                                                                                                                 | 1. Normal 2. Increased 3. Decreased                                                                                                                                |
|                                         | Feeling of urination <input type="checkbox"/>                                                                                                                                                   | 1. Normal 2. Stranguria 3. Dribble of urine 4. Incontinence 5. Enuresis                                                                                            |





Name of participant: \_\_\_\_\_

Participant ID: \_\_\_\_\_

Other therapy for pain control No Yes (If yes, please provide details)

| Name of treatment | Usage and dosage | Starting date        | Currently use?                                           | If it is no longer used, please provide ending date |
|-------------------|------------------|----------------------|----------------------------------------------------------|-----------------------------------------------------|
|                   |                  | □□ (D) □□(M) □□□□(Y) | <input type="checkbox"/> Yes <input type="checkbox"/> No | □□ (D) □□(M) □□□□(Y)                                |
|                   |                  | □□ (D) □□(M) □□□□(Y) | <input type="checkbox"/> Yes <input type="checkbox"/> No | □□ (D) □□(M) □□□□(Y)                                |
|                   |                  | □□ (D) □□(M) □□□□(Y) | <input type="checkbox"/> Yes <input type="checkbox"/> No | □□ (D) □□(M) □□□□(Y)                                |
|                   |                  | □□ (D) □□(M) □□□□(Y) | <input type="checkbox"/> Yes <input type="checkbox"/> No | □□ (D) □□(M) □□□□(Y)                                |
|                   |                  | □□ (D) □□(M) □□□□(Y) | <input type="checkbox"/> Yes <input type="checkbox"/> No | □□ (D) □□(M) □□□□(Y)                                |

Frequency of breakthrough pain and rescue medication used in the past 24 hours

No Yes (If yes, please provide details)

| Onset time           | Intensity (NRS)          | Name, usage and dosage of rescue medication | Time administered    |
|----------------------|--------------------------|---------------------------------------------|----------------------|
| □□ (Hour) □□(Minute) | <input type="checkbox"/> |                                             | □□ (Hour) □□(Minute) |
| □□ (Hour) □□(Minute) | <input type="checkbox"/> |                                             | □□ (Hour) □□(Minute) |
| □□ (Hour) □□(Minute) | <input type="checkbox"/> |                                             | □□ (Hour) □□(Minute) |
| □□ (Hour) □□(Minute) | <input type="checkbox"/> |                                             | □□ (Hour) □□(Minute) |
| □□ (Hour) □□(Minute) | <input type="checkbox"/> |                                             | □□ (Hour) □□(Minute) |

Name of participant: \_\_\_\_\_

Participant ID: \_\_\_\_\_

### Summary of Trail Completion

1. Did the participant complete the whole trial, including every treatment session and follow-ups: Yes No (If no, please complete the following blanks)

2. Date of withdrawal/termination: \_\_\_\_\_

2.1 Withdrawal/termination was first raised by (Please tick only one option):

Investigator Participant

Other: \_\_\_\_\_

2.2 Reason for withdrawal/termination (Please tick only one option):

Adverse events No or unsatisfied effects Lost to follow-up Violate to trial protocol

Others: \_\_\_\_\_

Follow-up observation or visits after withdrawal/ termination of adverse events (Please provide details of process and outcomes of the adverse events):

---

---

---

---

---

---

Signature of investigator: \_\_\_\_\_

Date: \_\_\_\_\_

Name of participant: \_\_\_\_\_

Participant ID: \_\_\_\_\_

**Records of Medications and Other Therapies**

Is there any medication or other therapy (apart from analgesic and acupuncture) used during trial: No Yes (If yes, please complete the form below)

| Name of medication or therapy | For what condition | Usage and dosage | Starting date                                                                                                                                                                                                       | Currently use?                                           | If it is no longer used, please provide ending date                                                                                                                                                                 |
|-------------------------------|--------------------|------------------|---------------------------------------------------------------------------------------------------------------------------------------------------------------------------------------------------------------------|----------------------------------------------------------|---------------------------------------------------------------------------------------------------------------------------------------------------------------------------------------------------------------------|
|                               |                    |                  | <input type="checkbox"/> <input type="checkbox"/> (D) <input type="checkbox"/> <input type="checkbox"/> (M) <input type="checkbox"/> <input type="checkbox"/> <input type="checkbox"/> <input type="checkbox"/> (Y) | <input type="checkbox"/> Yes <input type="checkbox"/> No | <input type="checkbox"/> <input type="checkbox"/> (D) <input type="checkbox"/> <input type="checkbox"/> (M) <input type="checkbox"/> <input type="checkbox"/> <input type="checkbox"/> <input type="checkbox"/> (Y) |
|                               |                    |                  | <input type="checkbox"/> <input type="checkbox"/> (D) <input type="checkbox"/> <input type="checkbox"/> (M) <input type="checkbox"/> <input type="checkbox"/> <input type="checkbox"/> <input type="checkbox"/> (Y) | <input type="checkbox"/> Yes <input type="checkbox"/> No | <input type="checkbox"/> <input type="checkbox"/> (D) <input type="checkbox"/> <input type="checkbox"/> (M) <input type="checkbox"/> <input type="checkbox"/> <input type="checkbox"/> <input type="checkbox"/> (Y) |
|                               |                    |                  | <input type="checkbox"/> <input type="checkbox"/> (D) <input type="checkbox"/> <input type="checkbox"/> (M) <input type="checkbox"/> <input type="checkbox"/> <input type="checkbox"/> <input type="checkbox"/> (Y) | <input type="checkbox"/> Yes <input type="checkbox"/> No | <input type="checkbox"/> <input type="checkbox"/> (D) <input type="checkbox"/> <input type="checkbox"/> (M) <input type="checkbox"/> <input type="checkbox"/> <input type="checkbox"/> <input type="checkbox"/> (Y) |
|                               |                    |                  | <input type="checkbox"/> <input type="checkbox"/> (D) <input type="checkbox"/> <input type="checkbox"/> (M) <input type="checkbox"/> <input type="checkbox"/> <input type="checkbox"/> <input type="checkbox"/> (Y) | <input type="checkbox"/> Yes <input type="checkbox"/> No | <input type="checkbox"/> <input type="checkbox"/> (D) <input type="checkbox"/> <input type="checkbox"/> (M) <input type="checkbox"/> <input type="checkbox"/> <input type="checkbox"/> <input type="checkbox"/> (Y) |
|                               |                    |                  | <input type="checkbox"/> <input type="checkbox"/> (D) <input type="checkbox"/> <input type="checkbox"/> (M) <input type="checkbox"/> <input type="checkbox"/> <input type="checkbox"/> <input type="checkbox"/> (Y) | <input type="checkbox"/> Yes <input type="checkbox"/> No | <input type="checkbox"/> <input type="checkbox"/> (D) <input type="checkbox"/> <input type="checkbox"/> (M) <input type="checkbox"/> <input type="checkbox"/> <input type="checkbox"/> <input type="checkbox"/> (Y) |
|                               |                    |                  | <input type="checkbox"/> <input type="checkbox"/> (D) <input type="checkbox"/> <input type="checkbox"/> (M) <input type="checkbox"/> <input type="checkbox"/> <input type="checkbox"/> <input type="checkbox"/> (Y) | <input type="checkbox"/> Yes <input type="checkbox"/> No | <input type="checkbox"/> <input type="checkbox"/> (D) <input type="checkbox"/> <input type="checkbox"/> (M) <input type="checkbox"/> <input type="checkbox"/> <input type="checkbox"/> <input type="checkbox"/> (Y) |
|                               |                    |                  | <input type="checkbox"/> <input type="checkbox"/> (D) <input type="checkbox"/> <input type="checkbox"/> (M) <input type="checkbox"/> <input type="checkbox"/> <input type="checkbox"/> <input type="checkbox"/> (Y) | <input type="checkbox"/> Yes <input type="checkbox"/> No | <input type="checkbox"/> <input type="checkbox"/> (D) <input type="checkbox"/> <input type="checkbox"/> (M) <input type="checkbox"/> <input type="checkbox"/> <input type="checkbox"/> <input type="checkbox"/> (Y) |
|                               |                    |                  | <input type="checkbox"/> <input type="checkbox"/> (D) <input type="checkbox"/> <input type="checkbox"/> (M) <input type="checkbox"/> <input type="checkbox"/> <input type="checkbox"/> <input type="checkbox"/> (Y) | <input type="checkbox"/> Yes <input type="checkbox"/> No | <input type="checkbox"/> <input type="checkbox"/> (D) <input type="checkbox"/> <input type="checkbox"/> (M) <input type="checkbox"/> <input type="checkbox"/> <input type="checkbox"/> <input type="checkbox"/> (Y) |
|                               |                    |                  | <input type="checkbox"/> <input type="checkbox"/> (D) <input type="checkbox"/> <input type="checkbox"/> (M) <input type="checkbox"/> <input type="checkbox"/> <input type="checkbox"/> <input type="checkbox"/> (Y) | <input type="checkbox"/> Yes <input type="checkbox"/> No | <input type="checkbox"/> <input type="checkbox"/> (D) <input type="checkbox"/> <input type="checkbox"/> (M) <input type="checkbox"/> <input type="checkbox"/> <input type="checkbox"/> <input type="checkbox"/> (Y) |
|                               |                    |                  | <input type="checkbox"/> <input type="checkbox"/> (D) <input type="checkbox"/> <input type="checkbox"/> (M) <input type="checkbox"/> <input type="checkbox"/> <input type="checkbox"/> <input type="checkbox"/> (Y) | <input type="checkbox"/> Yes <input type="checkbox"/> No | <input type="checkbox"/> <input type="checkbox"/> (D) <input type="checkbox"/> <input type="checkbox"/> (M) <input type="checkbox"/> <input type="checkbox"/> <input type="checkbox"/> <input type="checkbox"/> (Y) |

Signature of investigator: \_\_\_\_\_

Date: \_\_\_\_\_

Name of participant: \_\_\_\_\_

Participant ID: \_\_\_\_\_

**Reports of Adverse Events**

|                                                                                                                                                  |                                                                                                                                                                                                                                                                                                                                                                                                                                                                                                                                                                                                                                                                            |                                                                                                                                                                                                                                                                                                                                                                                                                                                                                                                                                                                                                                                                            |
|--------------------------------------------------------------------------------------------------------------------------------------------------|----------------------------------------------------------------------------------------------------------------------------------------------------------------------------------------------------------------------------------------------------------------------------------------------------------------------------------------------------------------------------------------------------------------------------------------------------------------------------------------------------------------------------------------------------------------------------------------------------------------------------------------------------------------------------|----------------------------------------------------------------------------------------------------------------------------------------------------------------------------------------------------------------------------------------------------------------------------------------------------------------------------------------------------------------------------------------------------------------------------------------------------------------------------------------------------------------------------------------------------------------------------------------------------------------------------------------------------------------------------|
| Is there any adverse event: <input type="checkbox"/> No <input type="checkbox"/> Yes (If yes, please fill in the form below)                     |                                                                                                                                                                                                                                                                                                                                                                                                                                                                                                                                                                                                                                                                            |                                                                                                                                                                                                                                                                                                                                                                                                                                                                                                                                                                                                                                                                            |
| Please record the events in details, including symptoms, signs, time, related test results and correspondent treatment with medical terminology: |                                                                                                                                                                                                                                                                                                                                                                                                                                                                                                                                                                                                                                                                            |                                                                                                                                                                                                                                                                                                                                                                                                                                                                                                                                                                                                                                                                            |
| Name/General description                                                                                                                         |                                                                                                                                                                                                                                                                                                                                                                                                                                                                                                                                                                                                                                                                            |                                                                                                                                                                                                                                                                                                                                                                                                                                                                                                                                                                                                                                                                            |
| Start time                                                                                                                                       | __ __ (Hour): __ __ (Minute); __ __ (Day), __ __ (Month), __ __ (Year)                                                                                                                                                                                                                                                                                                                                                                                                                                                                                                                                                                                                     | __ __ (Hour): __ __ (Minute); __ __ (Day), __ __ (Month), __ __ (Year)                                                                                                                                                                                                                                                                                                                                                                                                                                                                                                                                                                                                     |
| Ending time                                                                                                                                      | __ __ (Hour): __ __ (Minute); __ __ (Day), __ __ (Month), __ __ (Year)                                                                                                                                                                                                                                                                                                                                                                                                                                                                                                                                                                                                     | __ __ (Hour): __ __ (Minute); __ __ (Day), __ __ (Month), __ __ (Year)                                                                                                                                                                                                                                                                                                                                                                                                                                                                                                                                                                                                     |
| Severity                                                                                                                                         | <input type="checkbox"/> Mild <input type="checkbox"/> Moderate <input type="checkbox"/> Severe                                                                                                                                                                                                                                                                                                                                                                                                                                                                                                                                                                            | <input type="checkbox"/> Mild <input type="checkbox"/> Moderate <input type="checkbox"/> Severe                                                                                                                                                                                                                                                                                                                                                                                                                                                                                                                                                                            |
| Is there any correspondent treatment                                                                                                             | <input type="checkbox"/> No <input type="checkbox"/> Yes (If Yes, please tick the correspondent treatment)<br>Electro-acupuncture: <input type="checkbox"/> remain the same dose <input type="checkbox"/> increase dose <input type="checkbox"/> reduce dose<br><input type="checkbox"/> temporarily stop using electro-acupuncture <input type="checkbox"/> permanent stop using electro-acupuncture <input type="checkbox"/> not applicable <input type="checkbox"/> not known<br>Using other medications or therapies: <input type="checkbox"/> No <input type="checkbox"/> Yes, please record these treatment in the form “Records of Medications and Other therapies” | <input type="checkbox"/> No <input type="checkbox"/> Yes (If Yes, please tick the correspondent treatment)<br>Electro-acupuncture: <input type="checkbox"/> remain the same dose <input type="checkbox"/> increase dose <input type="checkbox"/> reduce dose<br><input type="checkbox"/> temporarily stop using electro-acupuncture <input type="checkbox"/> permanent stop using electro-acupuncture <input type="checkbox"/> not applicable <input type="checkbox"/> not known<br>Using other medications or therapies: <input type="checkbox"/> No <input type="checkbox"/> Yes, please record these treatment in the form “Records of Medications and Other therapies” |
| Correlation to electro-acupuncture                                                                                                               | <input type="checkbox"/> Certain <input type="checkbox"/> Probably/Likely <input type="checkbox"/> Possible <input type="checkbox"/> Unlikely<br><input type="checkbox"/> Conditional/Unclassified <input type="checkbox"/> Unassessable                                                                                                                                                                                                                                                                                                                                                                                                                                   | <input type="checkbox"/> Certain <input type="checkbox"/> Probably/Likely <input type="checkbox"/> Possible <input type="checkbox"/> Unlikely<br><input type="checkbox"/> Conditional/Unclassified <input type="checkbox"/> Unassessable                                                                                                                                                                                                                                                                                                                                                                                                                                   |
| Outcome                                                                                                                                          | <input type="checkbox"/> Death <input type="checkbox"/> Symptom continue <input type="checkbox"/> Symptom relieved or disappeared <input type="checkbox"/> Symptom relieved or disappeared but with sequela <input type="checkbox"/> Symptom improving<br><input type="checkbox"/> Not known                                                                                                                                                                                                                                                                                                                                                                               | <input type="checkbox"/> Death <input type="checkbox"/> Symptom continue <input type="checkbox"/> Symptom relieved or disappeared <input type="checkbox"/> Symptom relieved or disappeared but with sequela <input type="checkbox"/> Symptom improving<br><input type="checkbox"/> Not known                                                                                                                                                                                                                                                                                                                                                                               |
| Withdrawal                                                                                                                                       | <input type="checkbox"/> No <input type="checkbox"/> Yes                                                                                                                                                                                                                                                                                                                                                                                                                                                                                                                                                                                                                   | <input type="checkbox"/> No <input type="checkbox"/> Yes                                                                                                                                                                                                                                                                                                                                                                                                                                                                                                                                                                                                                   |
| Is it a severe adverse event                                                                                                                     | <input type="checkbox"/> No <input type="checkbox"/> Yes (If yes, please tick the correspondent ones below)<br><input type="checkbox"/> Lethal <input type="checkbox"/> Life-threatening <input type="checkbox"/> Require hospitalization or prolong hospitalization duration <input type="checkbox"/> Lead to apparent or permanent disability or loss of working ability <input type="checkbox"/> Lead to other critical medical incident                                                                                                                                                                                                                                | <input type="checkbox"/> No <input type="checkbox"/> Yes (If yes, please tick the correspondent ones below)<br><input type="checkbox"/> Lethal <input type="checkbox"/> Life-threatening <input type="checkbox"/> Require hospitalization or prolong hospitalization duration <input type="checkbox"/> Lead to apparent or permanent disability or loss of working ability <input type="checkbox"/> Lead to other critical medical incident                                                                                                                                                                                                                                |

Notes:

1. Adverse events include abnormal test results that were normal at recruitment. And the changes could not be explained by the development of the condition.
2. If the adverse events persist, please do not fill in the “ending time”.
3. Severity of adverse events: Mild: temperate symptom that has no impact on daily living and requires simple treatment or no treatment; moderate: discomfort symptom that has an impact on

Name of participant: \_\_\_\_\_

Participant ID: \_\_\_\_\_

daily living, but can be relieved with treatment and would not lead to severe or permanent harm patient; severe: seriously impact daily living or the development of spasticity, or requiring stronger or larger dose of treatment.

4. Please copy and attach the additional pages of “Reports of Adverse Events” if there are more than two adverse events reported.

Signature of investigator: \_\_\_\_\_

Date: \_\_\_\_\_

Name of participant: \_ \_ \_ \_ \_

Participant ID: \_ \_ \_ \_ \_
